# Supplementary material
Source: Springer Nature journal article supplement (https://www.springermedizin.de/resource/supplementary/12884_2013_991_MOESM4_ESM.pdf/9458726)

### GDM prevalence

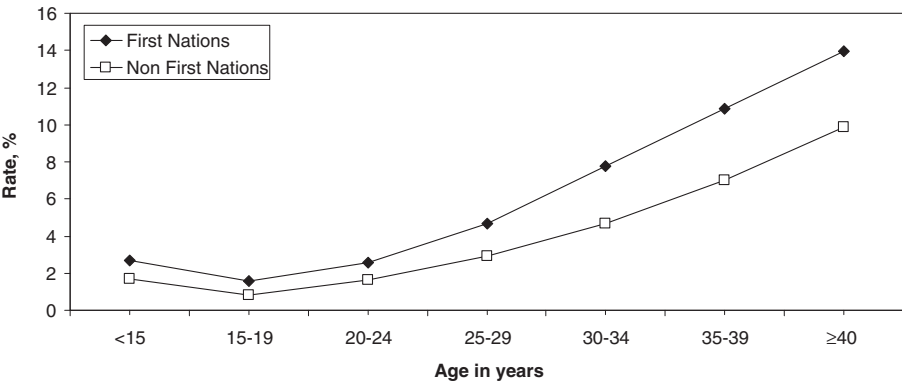

### Pre-existing diabetes prevalence

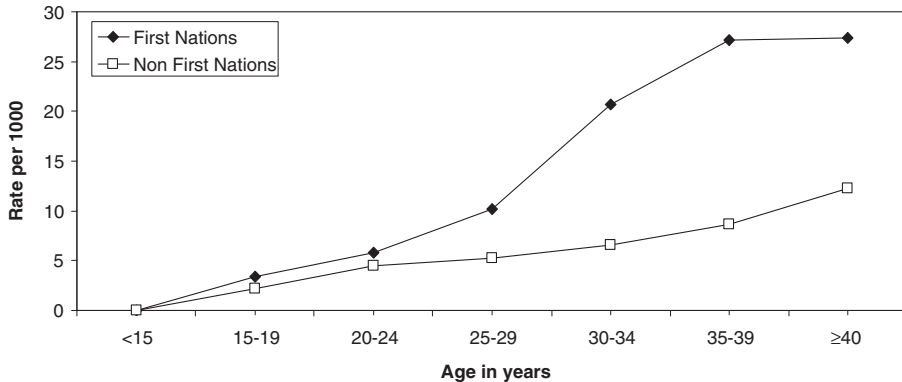

Supplement: MOESM4 [file 9458726]
